# Supplementary material
Source: ML conference proceedings conference paper supplement (https://openreview.net/forum?id=BQ0jaVCZRK)

claude-3-5-sonnet

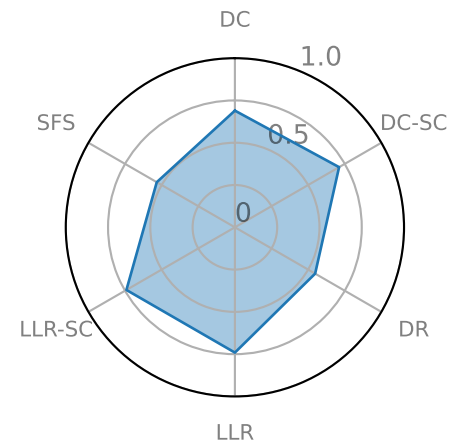

claude-3-opus

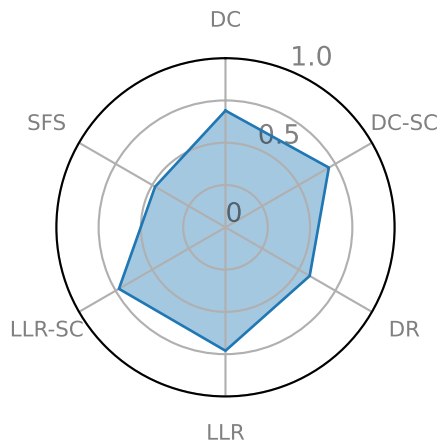

claude-3-sonnet

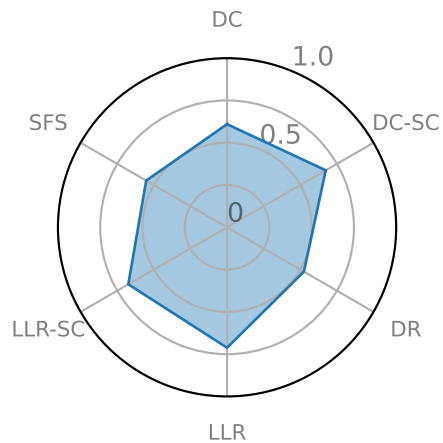

claude-3-haiku

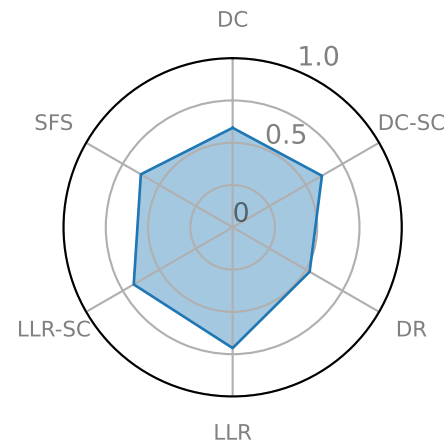

gemma-3

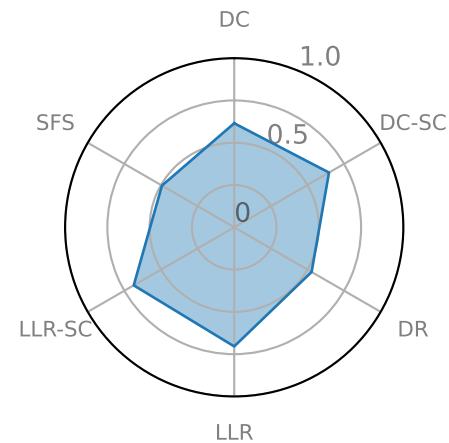

gpt-35-turbo

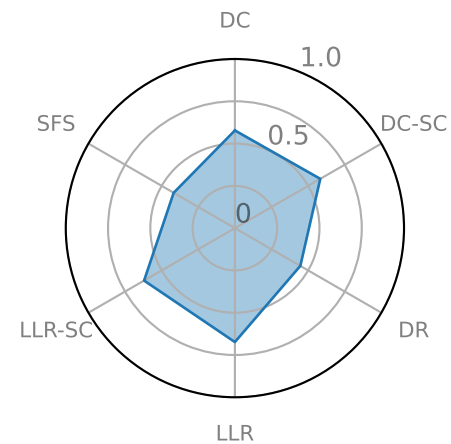

gpt-4

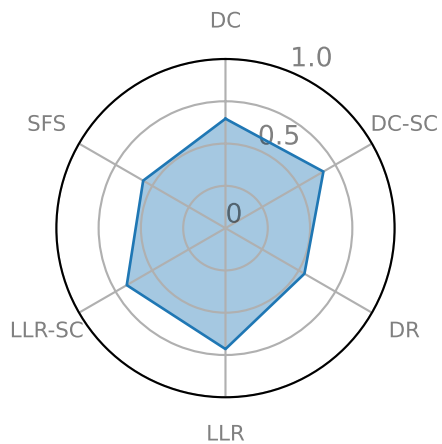

gpt-4o

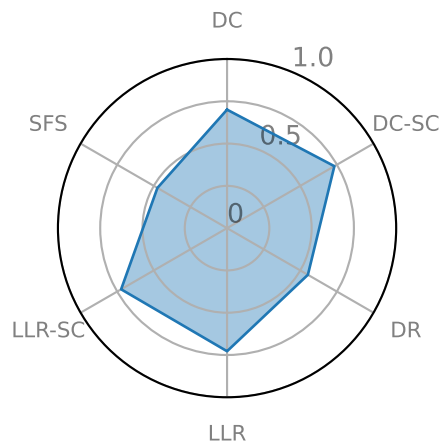

gpt-4o-mini

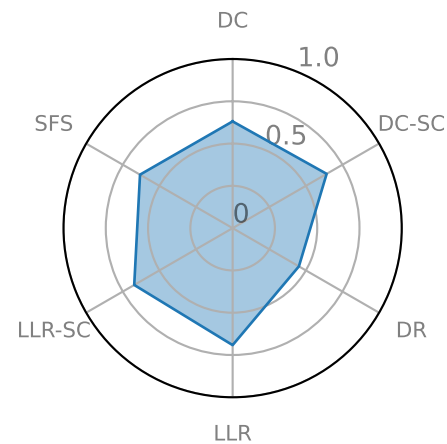

o1-mini

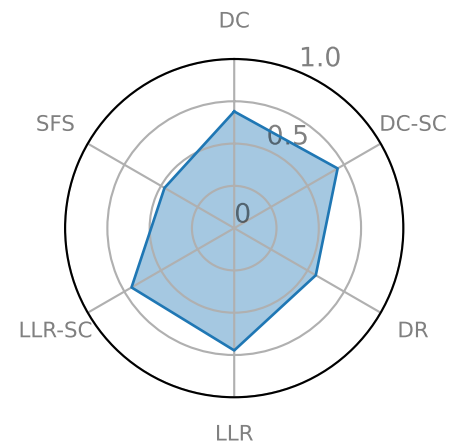

llama3-70b-instruct

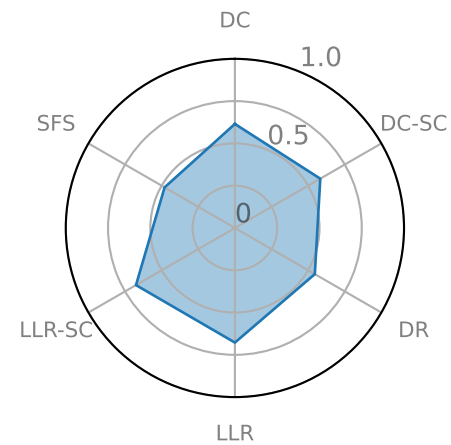

llama3-8b-instruct

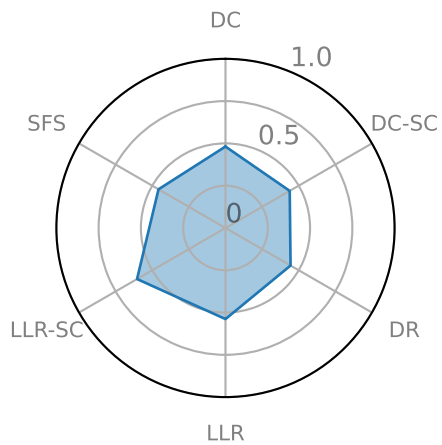

mistral-small-instruct-24B

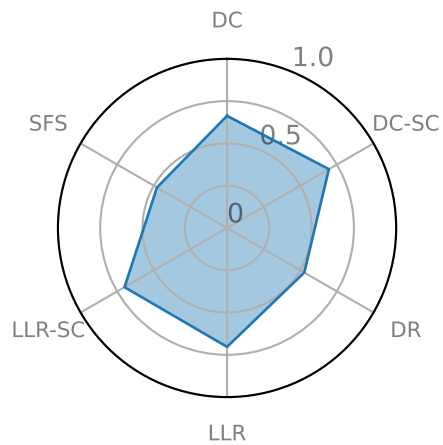

phi-v4

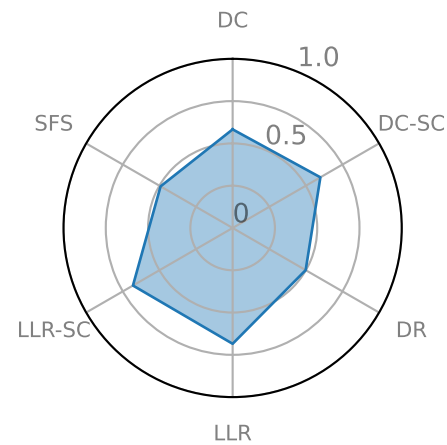

qwen-v2.5-14b-instruct

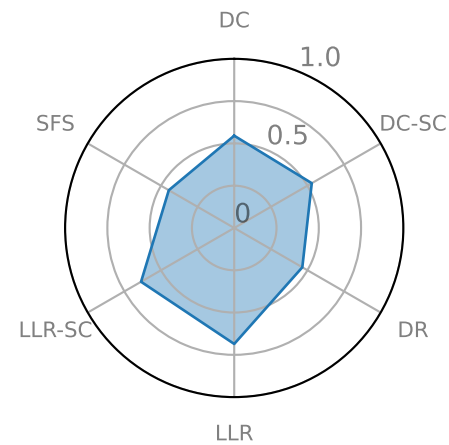

Supplement: supplementary_material [file average_accuracy_by_test.pdf › plots/average_accuracy_by_test.pdf]
