# Supplementary material
Source: ML conference proceedings conference paper supplement (https://openreview.net/forum?id=BQ0jaVCZRK)

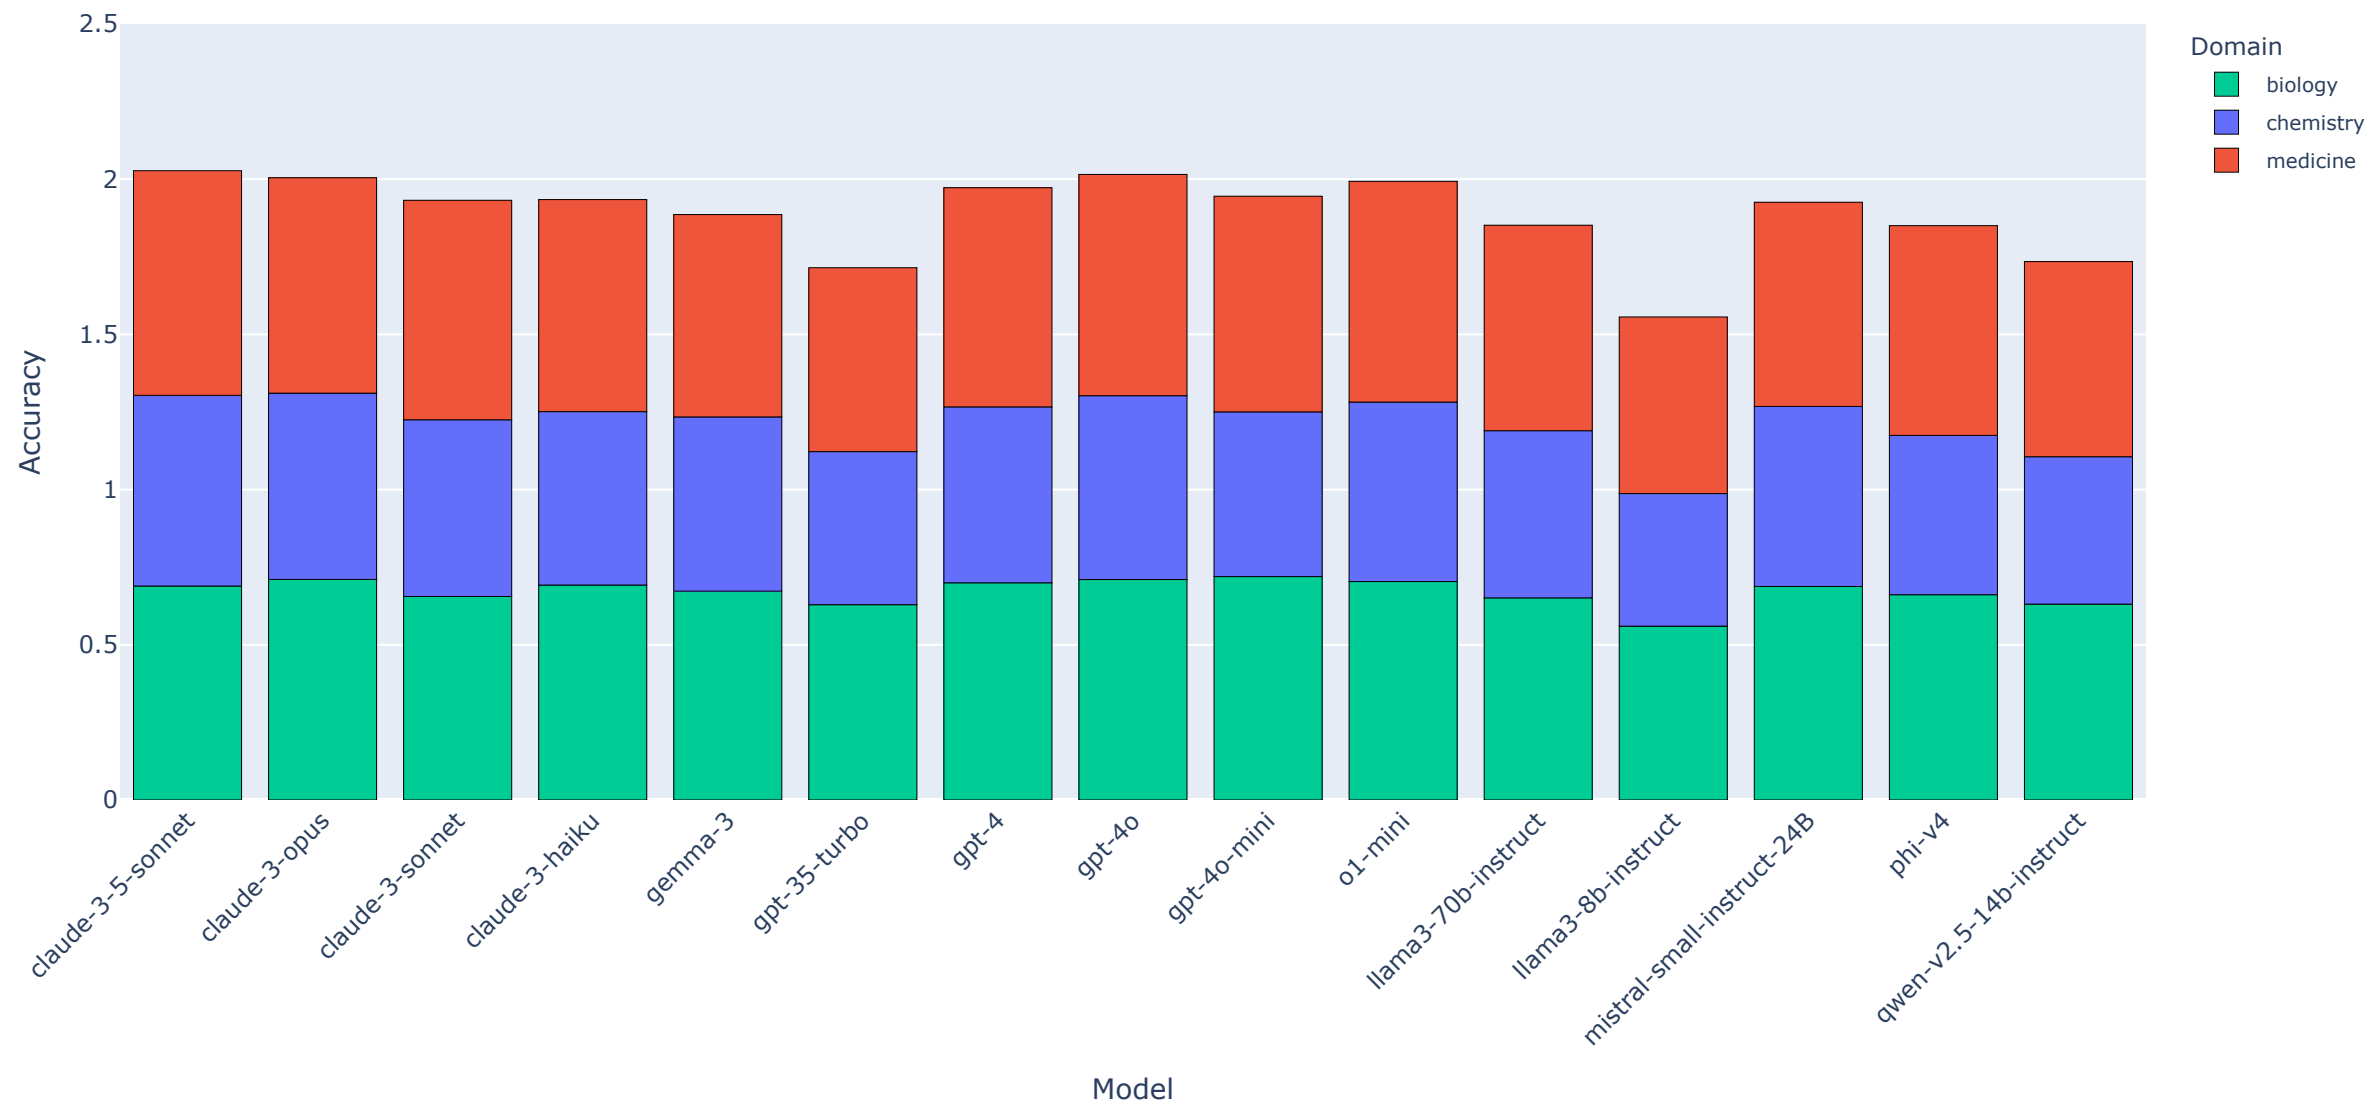

Supplement: supplementary_material [file average_accuracy_by_domain.pdf › plots/average_accuracy_by_domain.pdf]

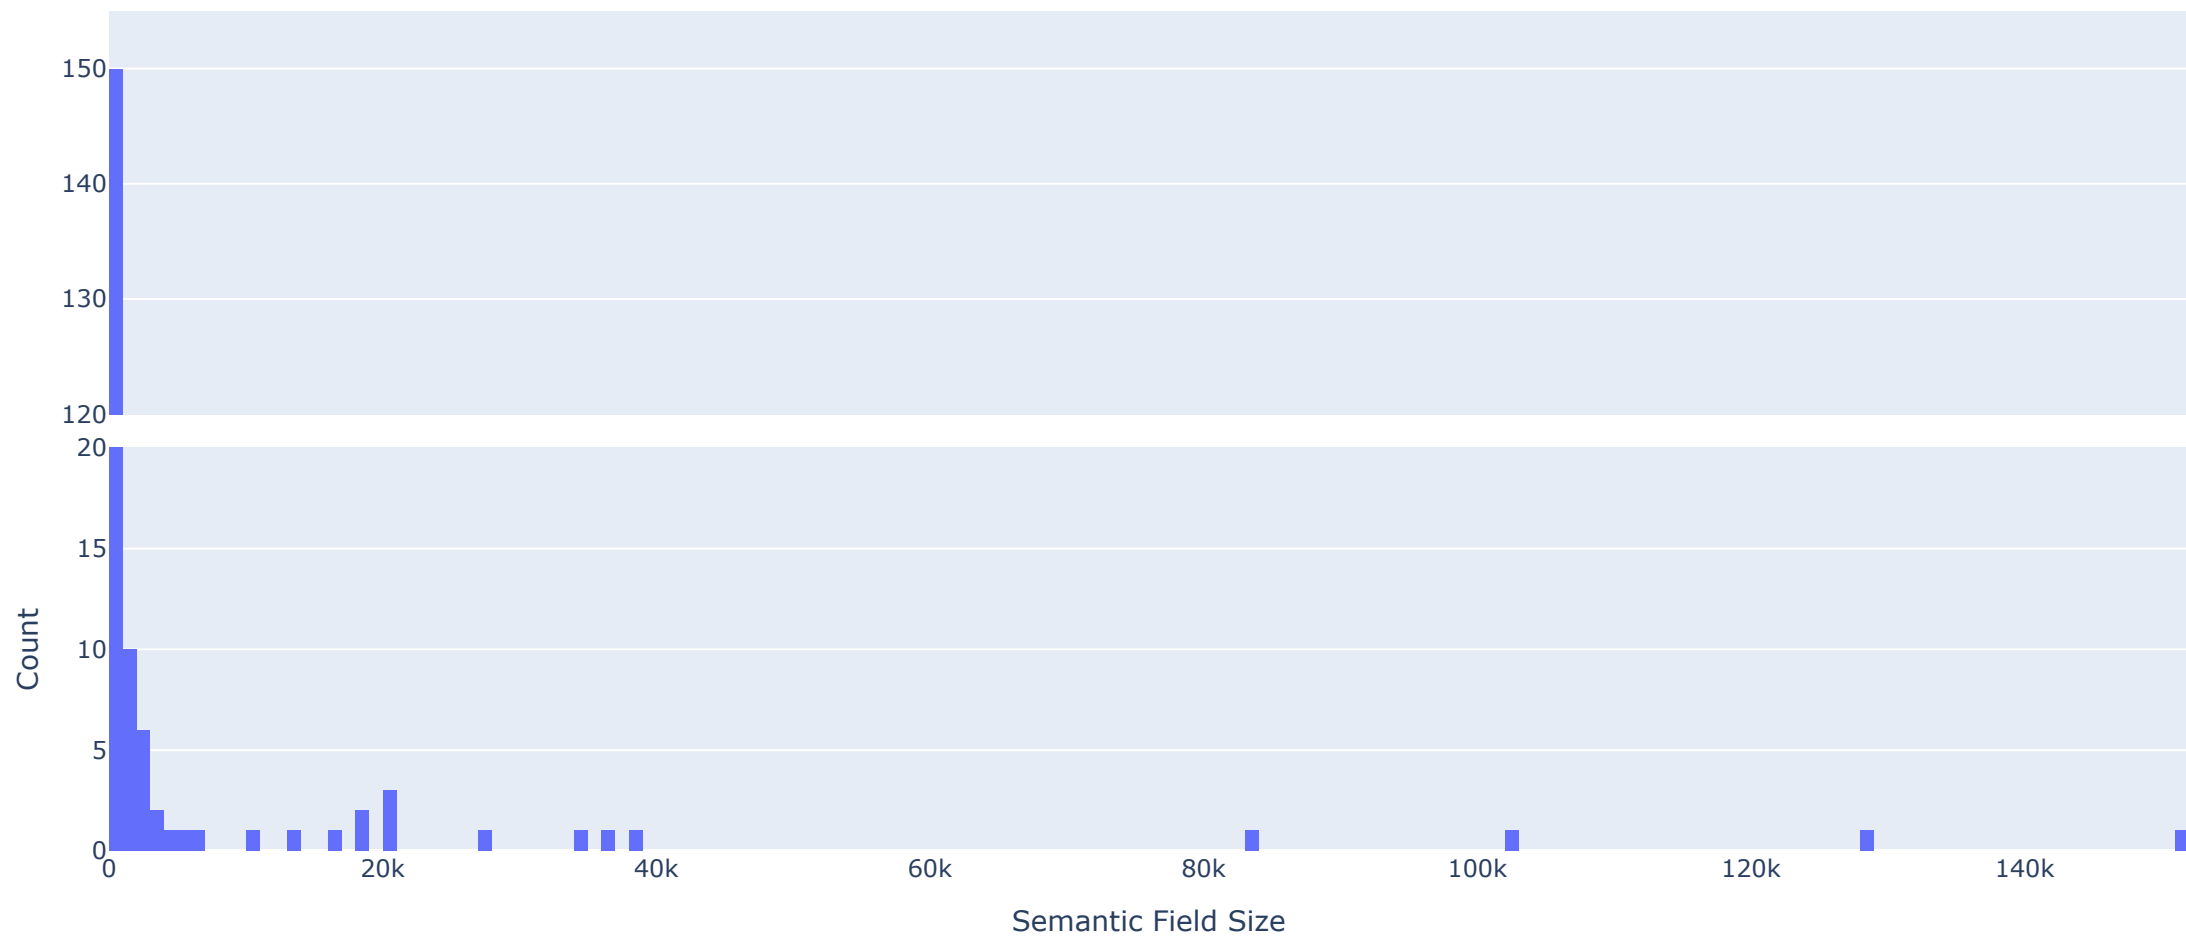

Supplement: supplementary_material [file semantic_field_size_histogram.pdf › plots/semantic_field_size_histogram.pdf]
